# Supplementary material for: iPLA2β Contributes to ER Stress-Induced Apoptosis during Myocardial Ischemia/Reperfusion Injury
Source: MDPI journal article supplement (doi:10.3390/cells10061446), 2021-06-09
Supplement: s1 [file s1]

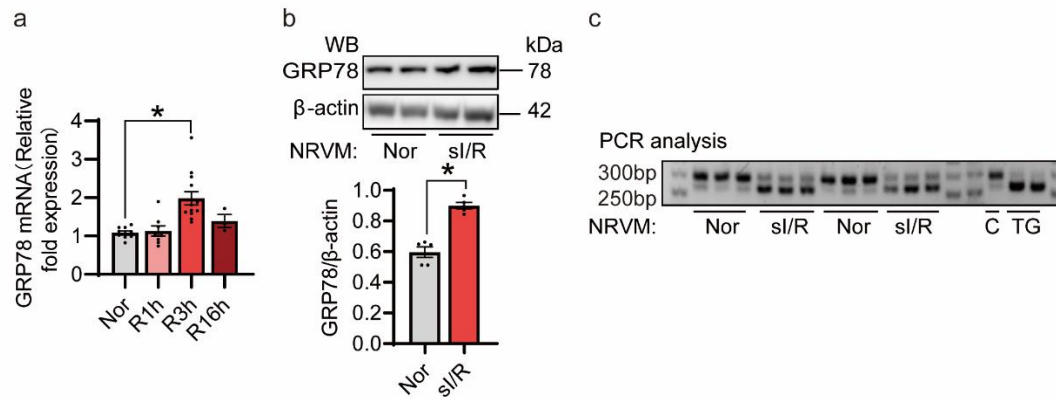

**Supplementary Fig S1.** Simulated ischemia/reperfusion (sI/R) injury-triggered ER stress in NRVMs. (a) sI/R led to strong induction of the ER resident chaperone GRP78 at mRNA level. NRVMs were subjected to ischemia for 3 h, followed by different times of reperfusion. Quantification real-time PCR was conducted to measure mRNA levels with 18S as an internal control.  $n = 3-11$  per group. (b) Ischemia for 3 h followed by reperfusion for 3 h induced the expression of the ER chaperone GRP78 at protein level. Immunoblotting showed that GRP78 was significantly increased at protein level.  $\beta$ -actin was used as a loading control. Quantification is shown below.  $n = 5$  per group. (c) Effects of sI/R on XBP1 splicing. NRVMs were subjected to 3 h ischemia and 3 h reperfusion or 0.5  $\mu$ M thapsigargin (TG), an ER stress activator, for 6 h as a positive control. XBP1 splicing: RT-PCR was used to assess the relative levels of unspliced XBP1 (290 bp) and spliced XBP1 (264 bp), as described in the Materials and Methods. Data are represented as mean  $\pm$  SEM. All experiments were independently replicated in triplicate. \* $p < 0.05$ .

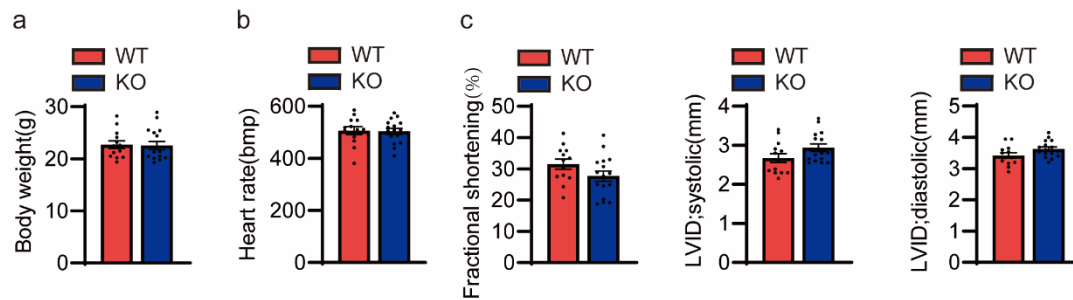

**Supplementary Fig S2.** Analysis of *Pla2g6*<sup>-/-</sup> mice and wild-type (WT) mice. (a) iPLA<sub>2</sub> $\beta$  knockout did not alter the mouse body weight.  $n = 13-16$  per group. (b) No changes in heart rate were observed between the *Pla2g6*<sup>-/-</sup> and wild-type mice.  $n = 13-16$  per group. (c) iPLA<sub>2</sub> $\beta$  knockout did not affect baseline ventricular contractile function, as evidenced by the lack of significant differences in ventricular fractional shortening, left ventricular internal diameter (LVID) systole, and LVID diastole.  $n = 13-16$  per group. Data are represented as mean  $\pm$  SEM. All experiments were independently replicated in triplicate. \* $p < 0.05$ .

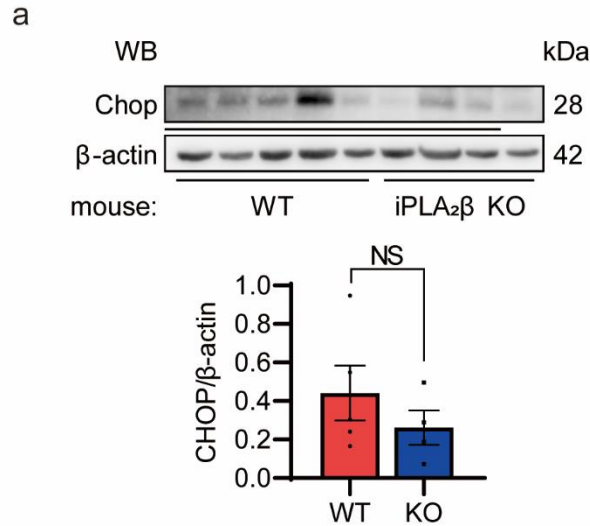

**Supplementary Fig S3.** No significant difference in the expression of CHOP at basal level between WT and KO mice (a) iPLA<sub>2</sub>β knockout did not affect the expression of basal level of CHOP protein.  $n = 4-5$  per group. Data are represented as mean  $\pm$  SEM. All experiments were independently replicated in triplicate. \* $p < 0.05$ .

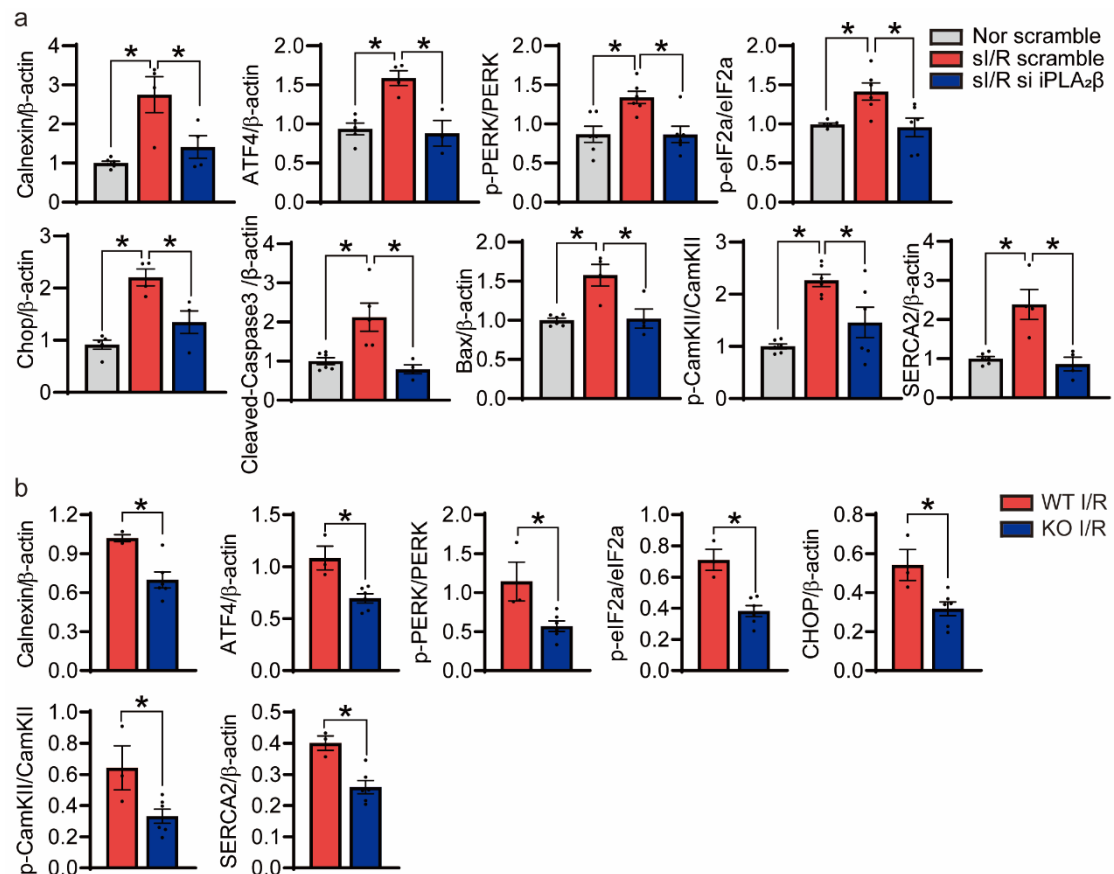

**Supplementary Fig S4.** The inhibition of iPLA<sub>2</sub>β *in vitro* and *in vivo* decreased ER stress as well as subsequent apoptosis. (a) Upregulated ER stress, apoptotic markers and Ca<sup>2+</sup> regulate related proteins caused by si/R decreases with the inhibition of iPLA<sub>2</sub>β in NRVMs. Quantification is shown.  $n = 3-6$  per group. (b) Upregulated ER stress, apoptotic markers and Ca<sup>2+</sup> regulate related proteins

caused by I/R decreases in *Pla2g6*<sup>-/-</sup> mice hearts. Quantification is shown. *n* = 3–6 per group. Data are represented as mean ± SEM. All experiments were independently replicated in triplicate. \**p* < 0.05.

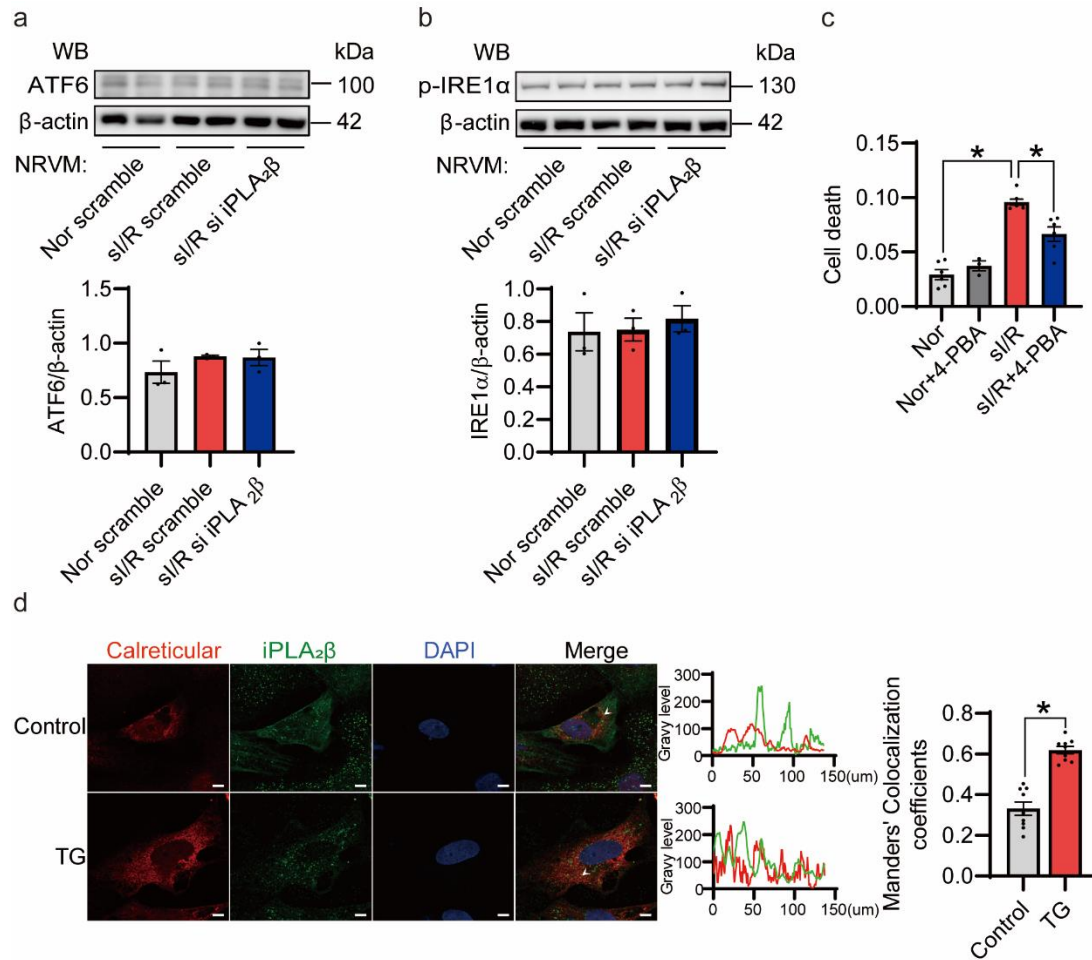

**Supplement Fig S5.** sI/R led to NRVM apoptosis induced by ER stress but not through the ATF6 and *p*-IRE1 $\alpha$  pathways. **(a)** There were no significant differences in the ATF6 protein expression in NRVMs subjected to sI/R. Quantification is shown below. *n* = 3 per group. **(b)** There were no significant differences in the *p*-IRE1 $\alpha$  protein expression in NRVMs subjected to sI/R. Quantification is shown below. *n* = 3 per group. **(c)** Pretreatment with 5 mM 4-phenylbutyric acid (4-PBA) for 30 min ameliorated myocardial cell death caused by sI/R injury. LDH levels were measured to determine relative cell death. *n* = 7 per group. **(d)** ER stress caused iPLA<sub>2</sub> $\beta$  translocation to ER. NRVMs were treated with 0.5  $\mu$ M thapsigargin (TG) for 6 h. iPLA<sub>2</sub> $\beta$  was revealed by confocal immunofluorescence staining (green). ER was revealed by confocal immunofluorescence staining for calreticulin (red). Scale bar = 20  $\mu$ m. The areas of interest are labeled by white arrows. The signaling intensity for both channels was scanned and recorded on the right. Colocalization of iPLA<sub>2</sub> $\beta$  and ER was quantified by Manders' colocalization coefficients (MCCs). *n* = 7–8 per group. Data are represented as mean ± SEM. All experiments were independently replicated in triplicate. \**p* < 0.05.
